# Supplementary material for: Nanostructured hexahedron of bismuth ferrite clusters: delicate synthesis processes and an efficient multiplex catalyst for organic pollutant degradation
Source: Royal Society of Chemistry journal article supplement (doi:10.1039/c5ra16409e), 2015-01-01
Supplement: c5ra16409e1.pdf [file c5ra16409e1.pdf]

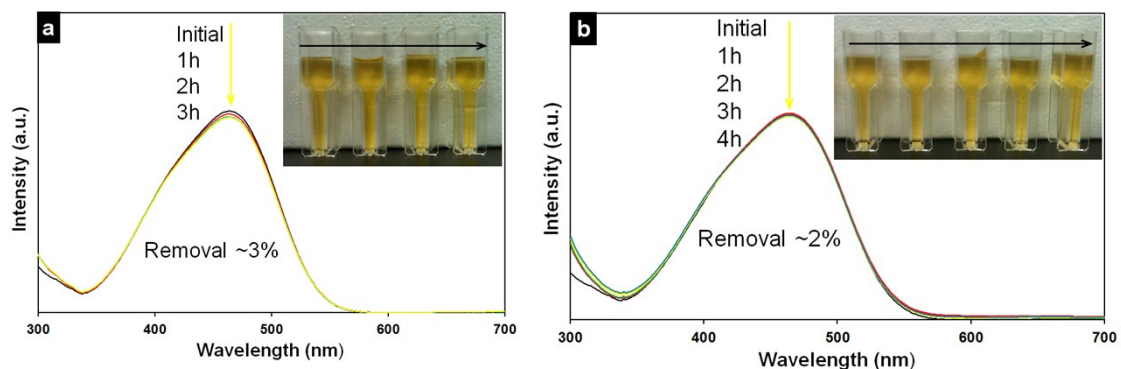

21

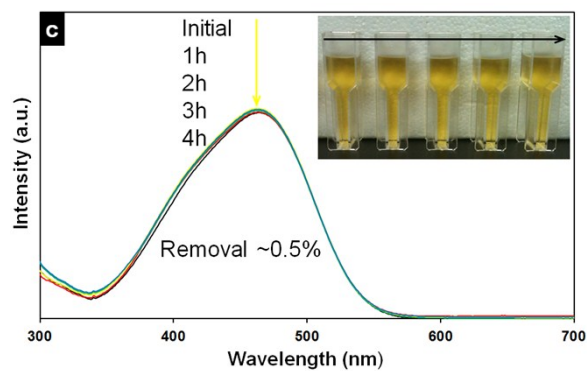

22

23

24 **Fig. S1.** Stability of MO under different conditions: (a) visible light with  $H_2O_2$ , (b)  $H_2O_2$  in  
 25 dark, (c) simulated solar.

26

27

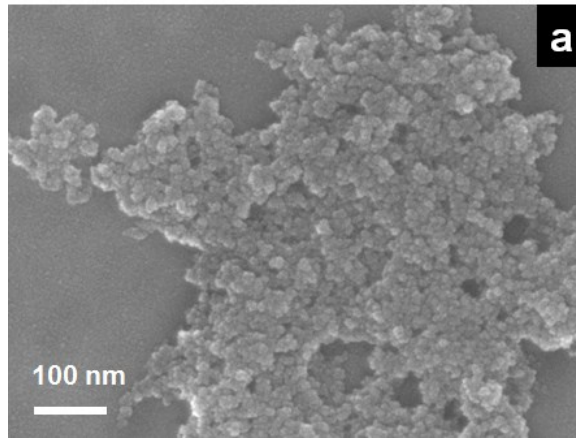

28

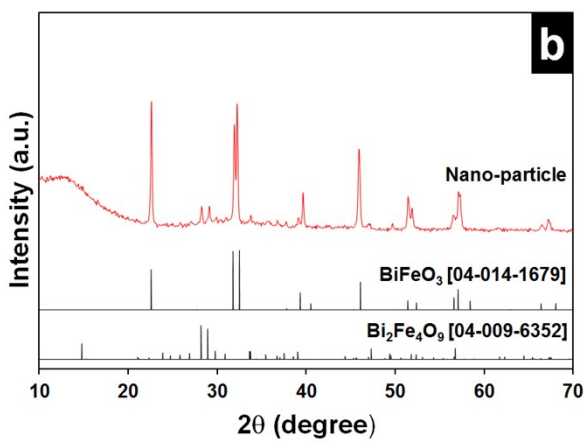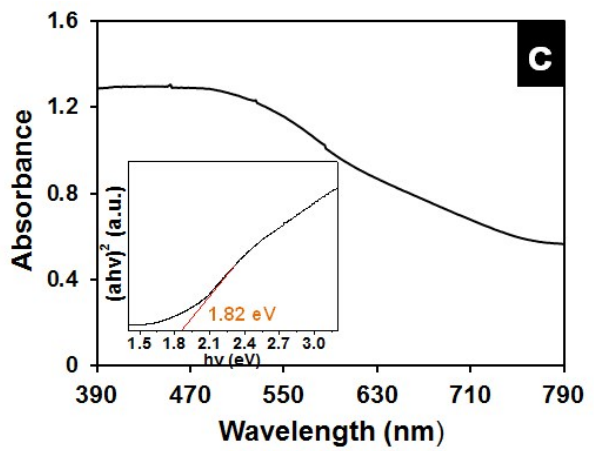

29

30 **Fig. S2.** SEM image of bismuth ferrite nanoparticles (a); XRD pattern of bismuth ferrite  
31 nanoparticles with perovskite and mullite crystalline phases (b); UV-vis absorption spectrum  
32 of bismuth ferrite nanoparticles and the corresponding Kubelka-Munk transformed  
33 reflectance spectrum (c).

34

35 For the hydrothermal treatment in co-solvent system, the effect of the different solvent  
36 ratios of methanol to water on the preparation of bismuth ferrites was investigated as well. As  
37 shown in Fig. S3, the prepared bismuth ferrites could be cube-like and pad-like shape with  
38 the reaction system of methanol and water, respectively. When the reaction system was  
39 replaced by co-solvent systems with the different ratios of methanol to water (i.e., 1:4, 1:1, or  
40 4:1 v/v), the prepared samples will become cuboid-like shapes with a minor particle size  
41 change.

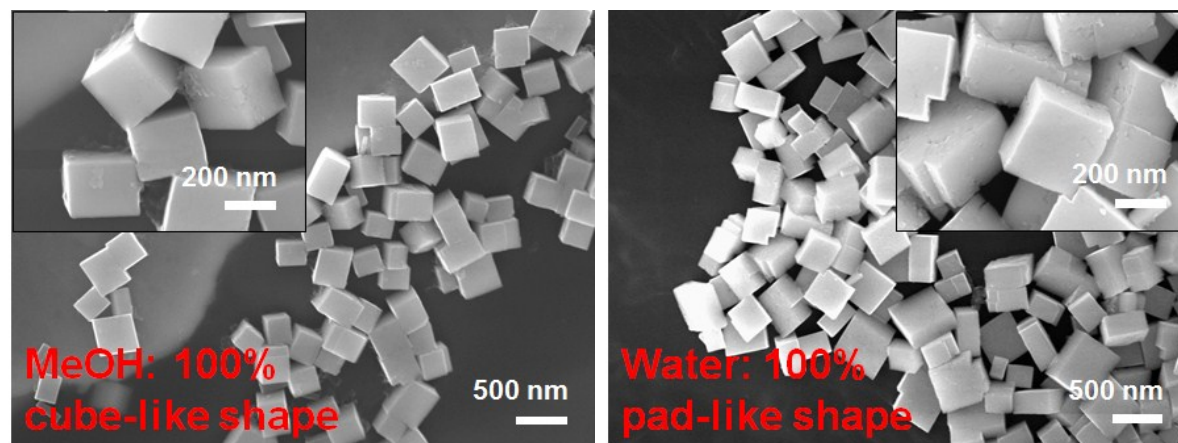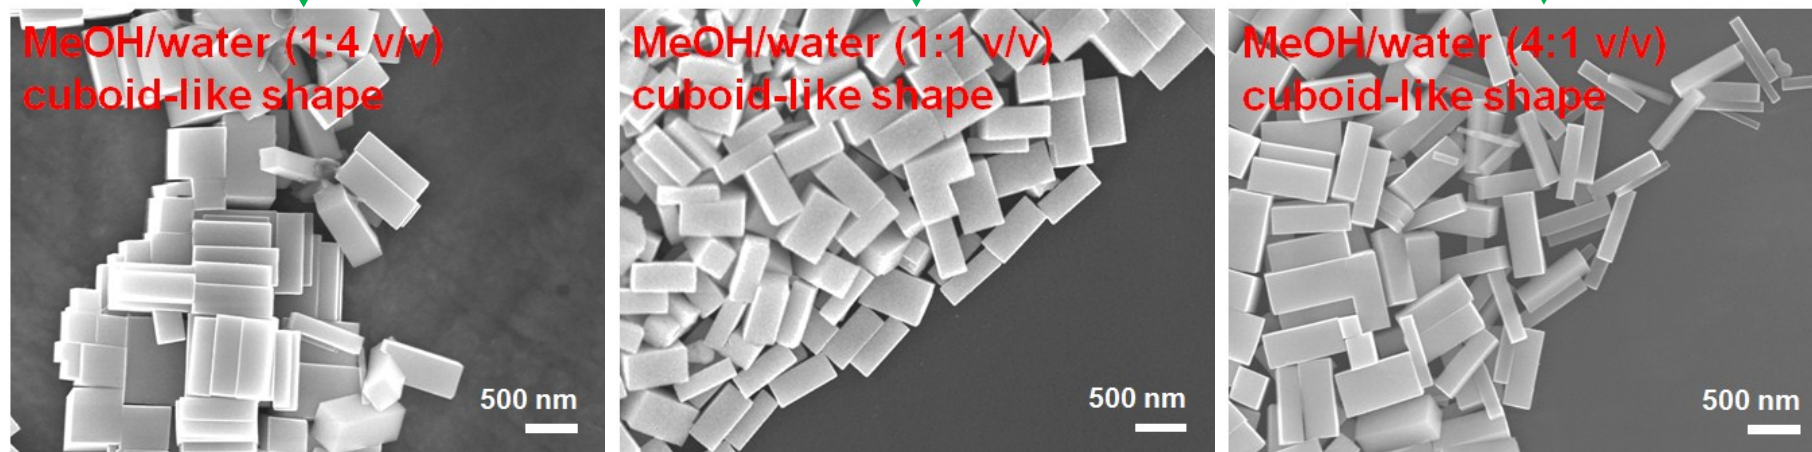

45 **Fig. S3.** SEM images of bismuth ferrites at different ratios of methanol/water by volume for hydrothermal treatment processes (conditions:  
46 holding 20 min at 200°C).

47 Fig. S4 shows the prepared bismuth ferrites with irregular morphologies when the  
48 reaction time is 5 or 120 min for the hydrothermal treatment processes. As shown in the  
49 figure (5 min), the bismuth ferrite nanoparticles are undergoing self-assembly, which  
50 possibly contribute to the gradual decomposition of citrate surfactants and the self-  
51 organization ability of bismuth ferrites under a high pressure and temperature. Moreover,  
52 with the increase of the reaction time for hydrothermal treatment, bismuth ferrites leads to  
53 formation of nanorods with nanocuboid in a slimline shape at the time of 120 min.

54

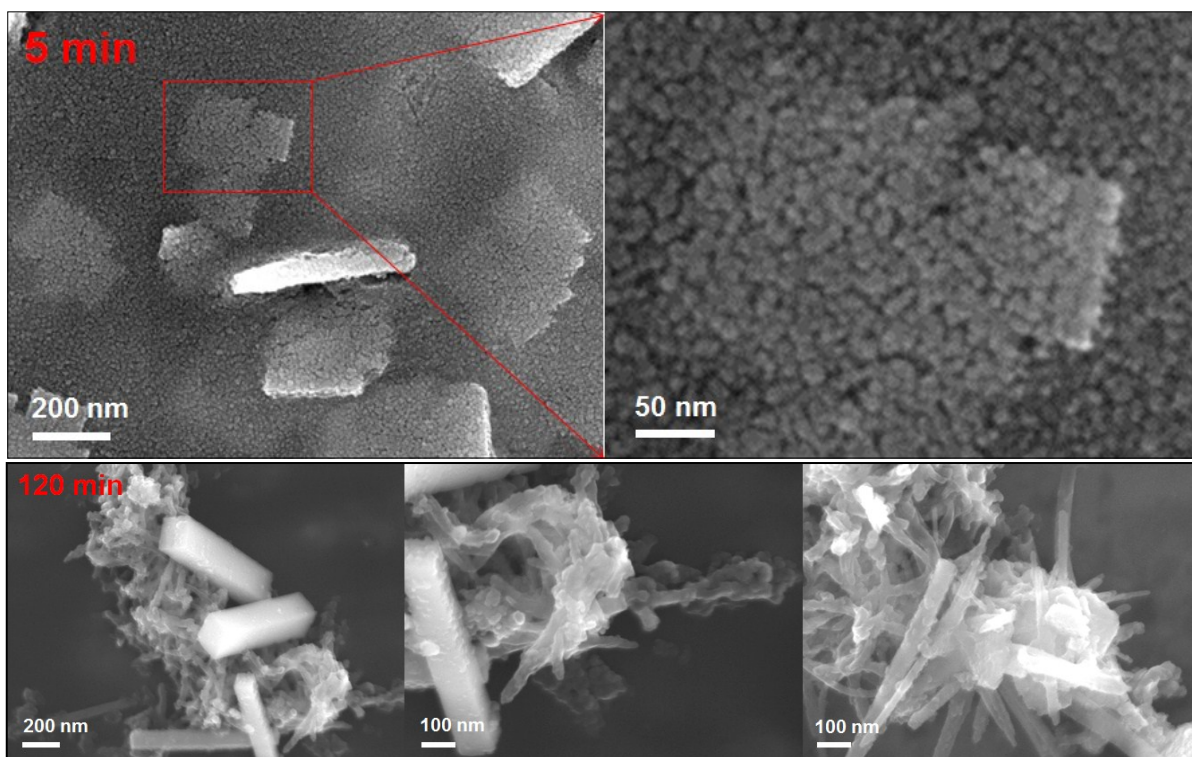

55

56

57 **Fig. S4.** SEM images of bismuth ferrites at different reaction time for 5 and 120 min during  
58 hydrothermal treatment processes.

59

60

61

62

63



64 As shown in Fig. S5a and b, the as-prepared bismuth ferrite nanoparticles could be used  
 65 to prepare mullite bismuth ferrites undergoing conventional calcination processes. The  
 66 corresponding reactions conditions are the ramping rate of  $5^{\circ}\text{C min}^{-1}$  and temperature of  
 67  $700^{\circ}\text{C}$ . As shown in Fig. S5a, the crystalline phase of bismuth ferrites could be mainly  
 68 perovskite at the temperature below  $500^{\circ}\text{C}$ . It could be composed of mullite bismuth ferrites  
 69 and sillenite bismuth ferrites at  $600^{\circ}\text{C}$  and further become mullite bismuth ferrites at a higher  
 70 temperature of  $700^{\circ}\text{C}$ . The corresponding major characteristic peaks are marked in the  
 71 figures. There is almost no significant influence of holding time from 12 to 24 h on the  
 72 crystalline phase (Fig. S5b), but the prepared mullite bismuth ferrites have the poor  
 73 morphology and particle size distribution with in the micron scale (SEM images shown in Fig.  
 74 S5c). In addition, when the holding time was reduced to 20 min at temperature of  $700^{\circ}\text{C}$ , the  
 75 prepared bismuth ferrites will be coexisting of mullite bismuth ferrites and perovskite  
 76 bismuth ferrites (Fig. S5b). Hence, it seems that calcination is not an ideal method to prepare  
 77 a relative pure bismuth ferrite because it needs higher temperature and longer holding times.

78

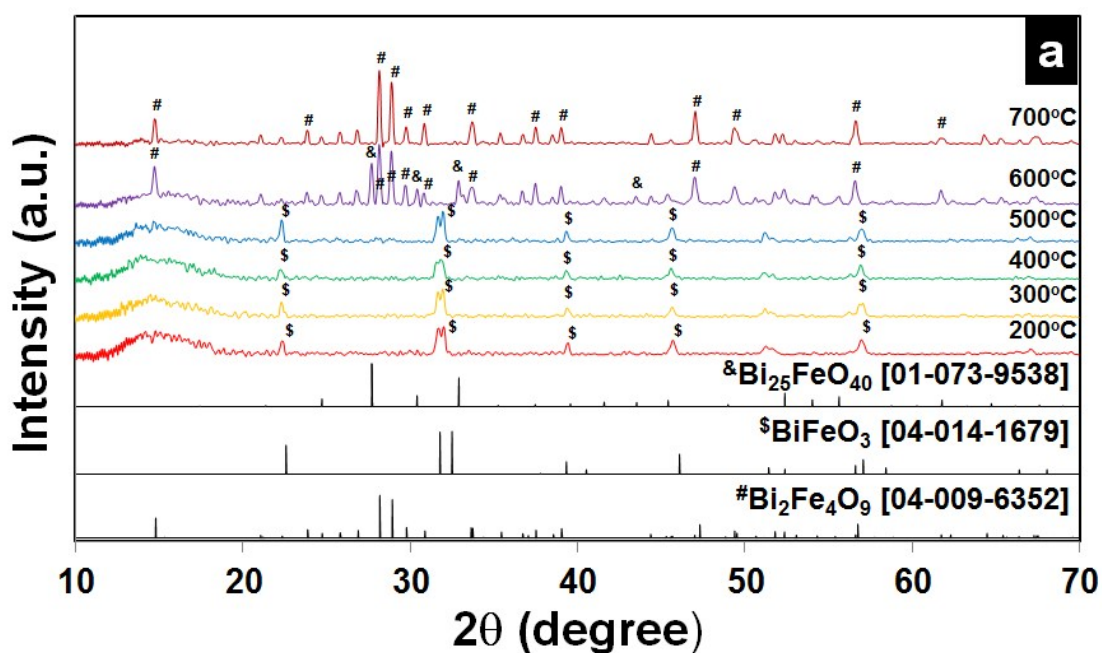

79

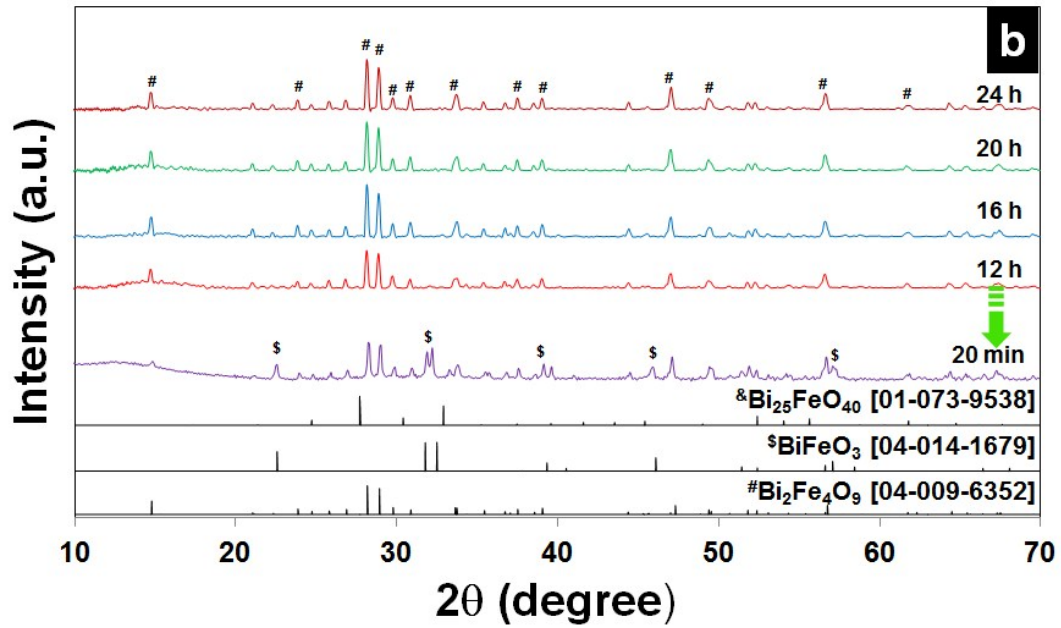

80

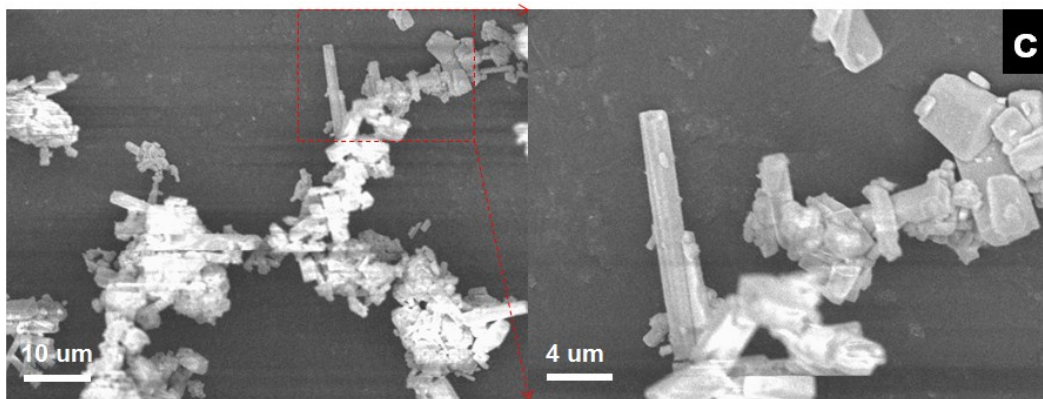

81

82 **Fig. S5.** XRD patterns marked with major characteristic peaks of the prepared bismuth  
 83 ferrites under different temperatures with conditions of ramping rate of  $5^{\circ}\text{C min}^{-1}$  and holding  
 84 time of 24 h (a); XRD patterns of the prepared bismuth ferrites under the different holding  
 85 times with conditions of ramping rate of  $5^{\circ}\text{C min}^{-1}$  and temperature of  $700^{\circ}\text{C}$  (b); SEM image  
 86 of the prepared mullite bismuth ferrites at temperature of  $700^{\circ}\text{C}$  for 24 h (c).

87



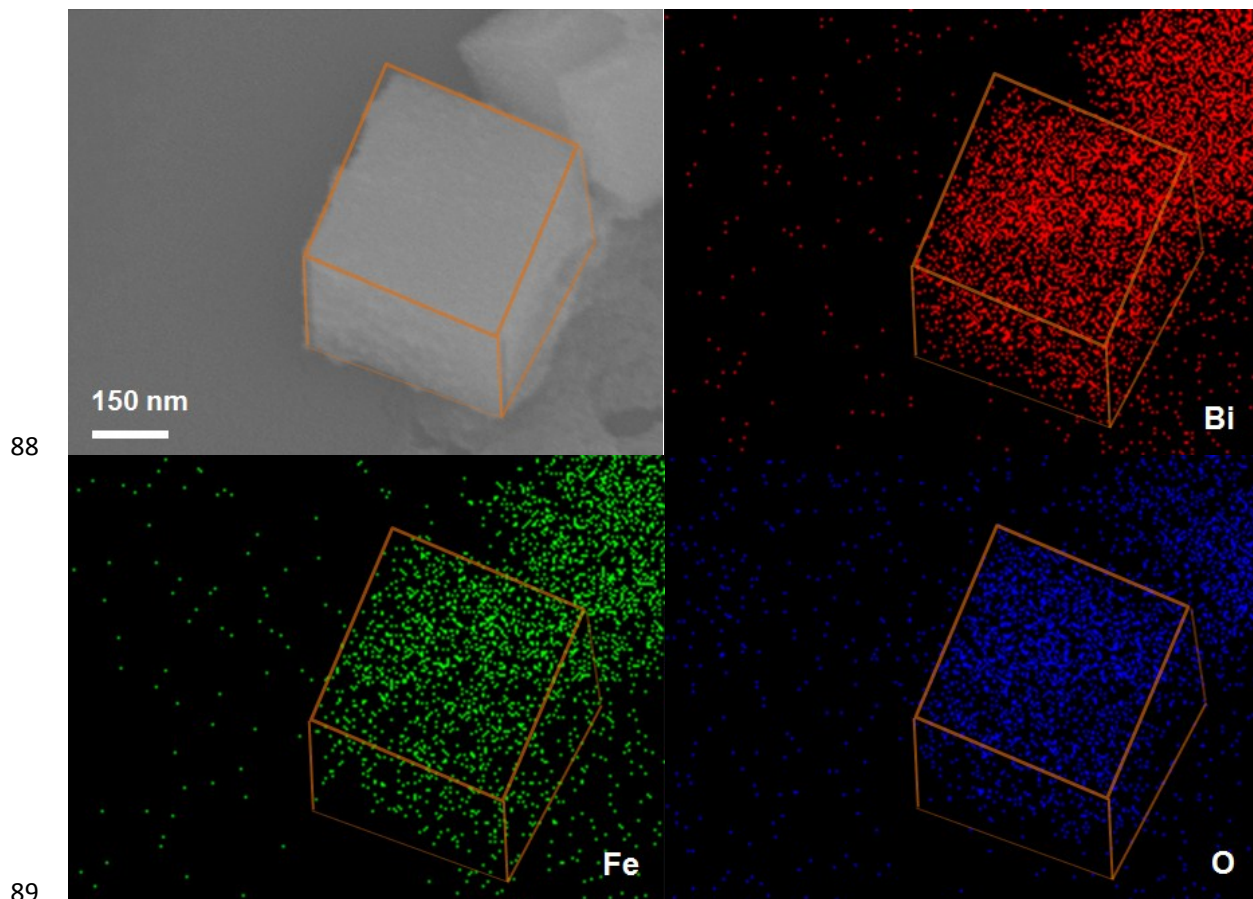

90 **Fig. S6.** SEM image of NSC-Bi<sub>2</sub>Fe<sub>4</sub>O<sub>9</sub> sample and the corresponding EDX elemental  
91 distribution mappings of Bi, Fe and O.

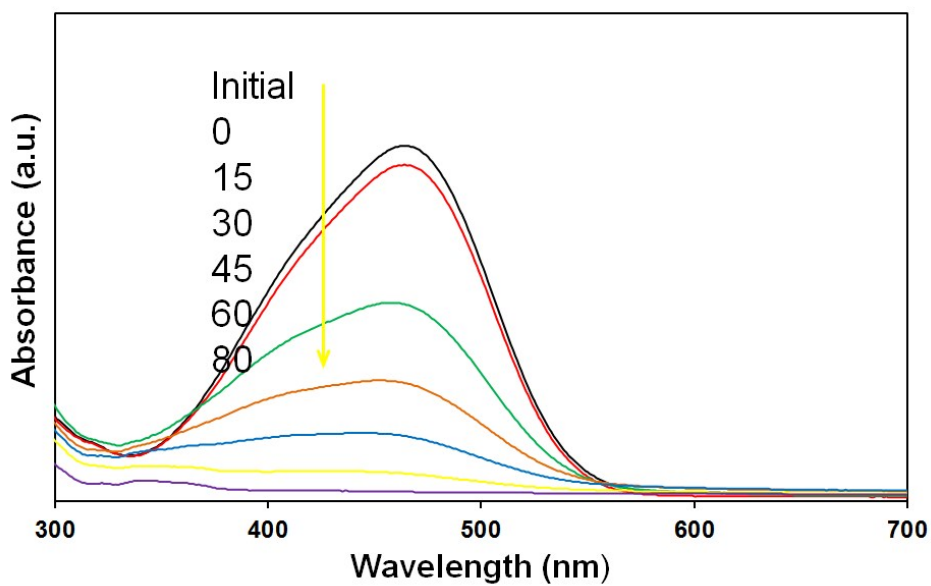

92

93 **Fig. S7.** UV-vis absorption spectra of MO degraded by NSP-Bi<sub>2</sub>Fe<sub>4</sub>O<sub>9</sub> within 80 min (The  
94 intensity at 0 min has slight change (~5%), which contributes to the adsorption of the  
95 pollutant on the catalyst surface at adsorption/desorption equilibrium status and suggests to  
96 neglect its adsorption capacity in this study).

97

98
